# Supplementary material
Source: Springer Nature journal article supplement (https://www.springermedizin.de/resource/supplementary/12958_2007_394_MOESM2_ESM.pdf/9567788)

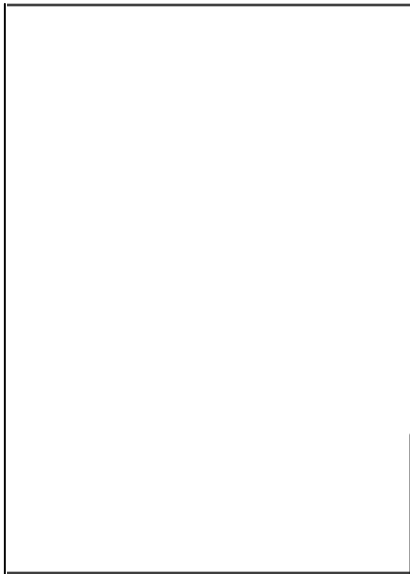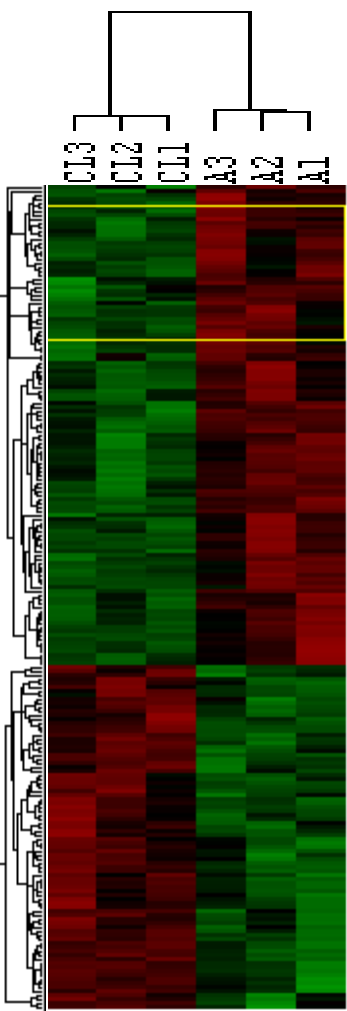

**A**

**B**

Supplement: MOESM2 [file 9567788]
